# Supplementary material
Source: PubMed Central journal article supplement (PMC3421849)
Supplement: AAC.00898-12_zac999101193so1.pdf [file AAC.00898-12_zac999101193so1.pdf]

| Primer                    | Sequence                         |
|---------------------------|----------------------------------|
| hERG1: Forward            | 5'-AGAACTGCGCCGTCATCTACTGCA-3'   |
| hERG1: Forward (qRT-PCR)  | 5'-GAGCGCAAAGTGGAATCGCC-3'       |
| hERG1: Reverse            | 5'-ACCATGTCCTTCTCCATCACCACCT-3'  |
| hERG1B: Forward           | 5'-AGCCCGCTACCACACACAGATGCT-3'   |
| hERG1B: Reverse           | 5'-AGATGAAGTACAGGGCGGTGAGCA-3'   |
| hERG1B: Reverse (qRT-PCR) | 5'-AAGCCCTTCAGCACCGCGTTC-3'      |
| Kir1.1: Forward           | 5'-GGCTACCGTTTTGCTCCCATAG-3'     |
| Kir1.1: Reverse           | 5'-CATAGCCTCTCTTCATCCTGGC-3'     |
| Kir2.1: Forward           | 5'-GCTATGGTTTCAGATGTGTACGGAT-3'  |
| Kir2.1: Reverse           | 5'-ATTTGAGGAGCTGTGCTCGAACATGA-3' |
| Kir2.1: Reverse (qRT-PCR) | 5'-CTTTGGCTTTGCCATCTTGGC-3'      |
| KCNQ5: Forward            | 5'-AACGTCAAGTACCGGCGGGTGCAG-3'   |
| KCNQ5: Reverse            | 5'-ACGGAGACTTCTGAGTGCAGACGTG-3'  |
| KCNQ5: Reverse (qRT-PCR)  | 5'-TTTGTGTGCTCAGGGATGGTAGAA-3'   |
| mERG1: Forward            | 5'-GCAGAGGAGCGCAAAGTGGA-3'       |
| mERG1: Reverse            | 5'-CAGGTCCACATCCACCACCA-3'       |
| mERG1: Reverse (qRT-PCR)  | 5'-CCATGTCCTTCTCCATCACTACTTC-3'  |
| mERG1B: Forward           | 5'-CGTACCACCTATGTTAATGCCAAC-3'   |
| mERG1B: Reverse           | 5'-CATGAGCAGGAAGAGCACTGCTG-3'    |
| mERG1B: Reverse (qRT-PCR) | 5'-GATCAGCTCCTCGGAGCCAGA-3'      |
| GAPDH: Forward            | 5'-CAAGGTCATCCATGACAACTTTG-3'    |
| GAPDH: Reverse            | 5'-GTCCACCACCCTGTTGCTGTAG-3'     |
| GAPDH: Forward (qRT-PCR)  | 5'-TTGGTATCGTGGAAGGACTC-3'       |
| GAPDH: Reverse (qRT-PCR)  | 5'-ACAGTCTTCTGGGTGGCAGT-3'       |

For each gene amplification the primer that was specifically designed for quantitative real-time PCR is marked as qRT-PCR
